# Supplementary material
Source: PubMed Central journal article supplement (PMC1478175)
Supplement: 7601136s1.pdf [file 7601136s1.pdf]

**Fig: S1**

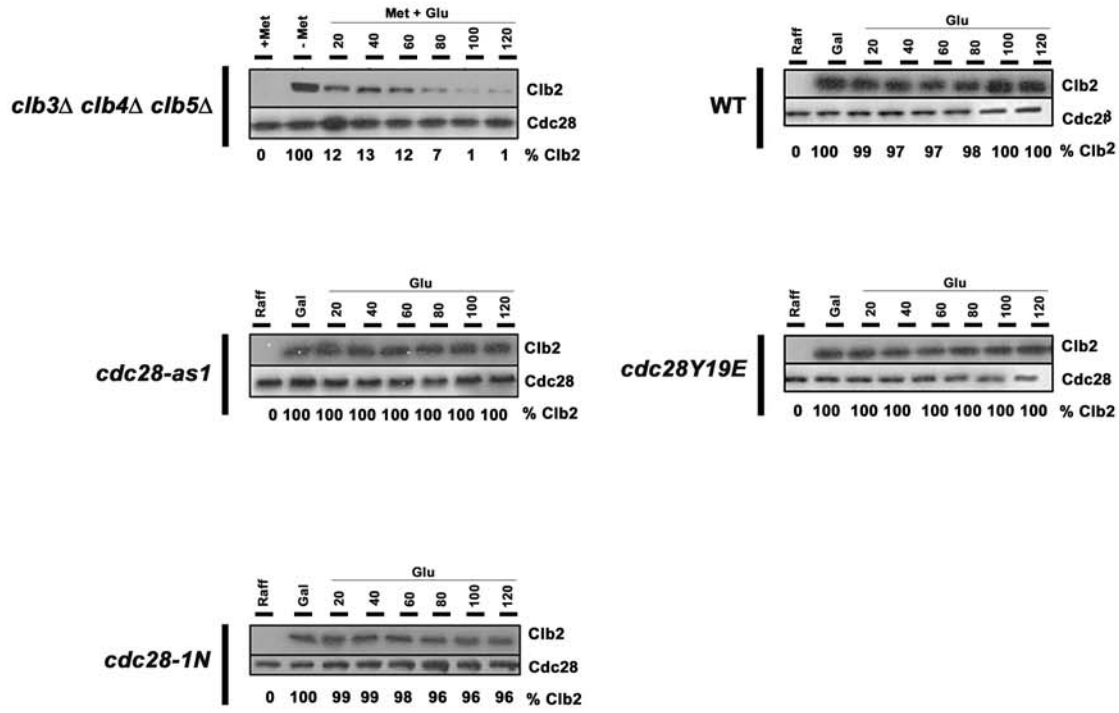

## Figure S1

Clb2 is stable in *cdc28Y19E* and *cdc28-as1*. WT, *cdc28Y19E*, *cdc28-as1* and *cdc28-1N* carrying *GAL-CLB2-cmyc<sub>3</sub>* on a *CEN* plasmid were arrested in YEP+Raff containing  $\alpha$  factor and released into respective arrest conditions into YEP+Raff+Gal for 45 mins (for WT) and 90 min (for *cdc28* mutants). Cells were transferred to YEP+Glu medium containing 1mg/ml cycloheximide. *clb3 $\Delta$*  *clb4 $\Delta$*  *clb5 $\Delta$*  *GAL-Clb5* cells carrying *MET-CLB2-HA<sub>3</sub>* on a *CEN* plasmid were arrested with  $\alpha$  factor in YEP+Raff. Cells were then transferred into methionine-deficient medium containing glucose. Fate of the Clb2 pulse was monitored by Western blotting.
